3 **A single intranasal dose of chimpanzee adenovirus-vectored vaccine protects**  
4 **against SARS-CoV-2 infection in rhesus macaques**

5

6 Ahmed O. Hassan<sup>1¶</sup>, Friederike Feldmann<sup>2¶</sup>, Haiyan Zhao<sup>3</sup>, David T. Curiel<sup>4</sup>, Atsushi Okumura<sup>5</sup>,  
7 Tsing-Lee Tang-Huau<sup>5</sup>, James Brett Case<sup>1</sup>, Kimberly Meade-White<sup>5</sup>, Julie Callison<sup>5</sup>, Jamie  
8 Lovaglio<sup>2</sup>, Patrick W. Hanley<sup>2</sup>, Dana P. Scott<sup>2</sup>, Daved H. Fremont<sup>3,6,7</sup>, Heinz Feldmann<sup>5\*</sup>, and  
9 Michael S. Diamond<sup>1,3,7\*‡</sup>

10

11 <sup>1</sup>Department of Medicine, Washington University School of Medicine, St. Louis, MO 63110, USA

12 <sup>2</sup>Rocky Mountain Veterinary Branch Division of Intramural Research, NIAID, NIH, Rocky Mountain  
13 Laboratories, Hamilton, MT, USA.

14 <sup>3</sup>Department of Pathology & Immunology, Washington University School of Medicine, St. Louis, MO 63110,  
15 USA

16 <sup>4</sup>Department of Radiation Oncology, Washington University School of Medicine, St. Louis, MO 63110, USA

17 <sup>5</sup>Laboratory of Virology, Division of Intramural Research, NIAID, NIH, Rocky Mountain Laboratories,  
18 Hamilton, MT, USA.

19 <sup>6</sup>Department of Biochemistry and Molecular Biophysics, Washington University School of Medicine, St.  
20 Louis, MO 63110, USA

21 <sup>7</sup>Department of Molecular Microbiology, Washington University School of Medicine, St. Louis, MO 63110,  
22 USA

23

24 ¶ Equal contributing authors.

25 \***Corresponding authors:** Heinz Feldmann (feldmannh@niaid.nih.gov) and Michael S. Diamond,  
26 M.D., Ph.D. (diamond@wusm.wustl.edu)

27 ‡ Lead Contact: Michael S. Diamond, M.D., Ph.D.

28

29

30

31 **SUMMARY**

32           The deployment of a vaccine that limits transmission and disease likely will be required to  
33 end the Coronavirus Disease 2019 (COVID-19) pandemic. We recently described the protective  
34 activity of an intranasally-administered chimpanzee adenovirus-vectored vaccine encoding a pre-  
35 fusion stabilized spike (S) protein (ChAd-SARS-CoV-2-S) in the upper and lower respiratory tract  
36 of mice expressing the human angiotensin-converting enzyme 2 (ACE2) receptor. Here, we show  
37 the immunogenicity and protective efficacy of this vaccine in non-human primates. Rhesus  
38 macaques were immunized with ChAd-Control or ChAd-SARS-CoV-2-S and challenged one  
39 month later by combined intranasal and intrabronchial routes with SARS-CoV-2. A single  
40 intranasal dose of ChAd-SARS-CoV-2-S induced neutralizing antibodies and T cell responses  
41 and limited or prevented infection in the upper and lower respiratory tract after SARS-CoV-2  
42 challenge. As this single intranasal dose vaccine confers protection against SARS-CoV-2 in non-  
43 human primates, it is a promising candidate for limiting SARS-CoV-2 infection and transmission  
44 in humans.

45

## 46 INTRODUCTION

47 Severe acute respiratory syndrome coronavirus 2 (SARS-CoV-2) was first isolated in late  
48 2019 from patients with severe respiratory illness in China (Zhou et al., 2020b). SARS-CoV-2  
49 infection results in a clinical syndrome, Coronavirus Disease 2019 (COVID-19) that can progress  
50 to respiratory failure (Guan et al., 2020) and systemic inflammatory disease (Cheung et al., 2020;  
51 Mao et al., 2020; Wichmann et al., 2020). The elderly, immunocompromised, and those with co-  
52 morbidities (e.g., obesity, diabetes, and hypertension) are at greatest risk of death from COVID-  
53 19 (Zhou et al., 2020a). Virtually all countries and territories have been affected with more than  
54 97 million infections and 2 million deaths recorded worldwide (<https://covid19.who.int/>). The rapid  
55 expansion and prolonged nature of the COVID-19 pandemic and its accompanying morbidity,  
56 mortality, and destabilizing socioeconomic effects have made the development and deployment  
57 of a SARS-CoV-2 vaccine an urgent global health priority.

58 The spike (S) protein of the SARS-CoV-2 virion engages the cell-surface receptor  
59 angiotensin-converting enzyme 2 (ACE2) to promote coronavirus entry into human cells (Letko et  
60 al., 2020). Because the S protein is critical for viral entry, it has been targeted for vaccine  
61 development and therapeutic antibody interventions. SARS-CoV-2 S proteins are cleaved to yield  
62 S1 and S2 fragments, followed by further processing of S2 to yield a smaller S2' protein (Hoffmann  
63 et al., 2020). The S1 protein includes the receptor binding domain (RBD) and the S2 protein  
64 promotes membrane fusion. The prefusion form of the SARS-CoV-2 S protein (Wrapp et al.,  
65 2020), which displays the RBD in an 'up' position, is recognized by potently neutralizing  
66 monoclonal antibodies (Barnes et al., 2020; Cao et al., 2020b; Pinto et al., 2020; Tortorici et al.,  
67 2020; Zost et al., 2020) or protein inhibitors (Cao et al., 2020a).

68 Multiple academic and industry groups are developing vaccine candidates that target the  
69 SARS-CoV-2 S protein (Burton and Walker, 2020) using several platforms including DNA plasmid,  
70 lipid nanoparticle encapsulated mRNA, inactivated virion, subunit, and viral-vectored vaccines  
71 (Graham, 2020), with most requiring two doses. While several vaccines from different platforms

72 are in advanced clinical trials in humans to evaluate safety and efficacy, all lead candidates,  
73 including the Pfizer/BioNTech BNT162b2 and Moderna 1273 mRNA vaccines (Baden et al., 2020;  
74 Polack et al., 2020) that were granted emergency use authorization (EUA), are administered by  
75 intramuscular injection resulting in robust systemic yet poor mucosal immunity. Thus, questions  
76 remain as to the ability of these vaccines to curtail both transmission and severe disease,  
77 especially if upper airway infection is not prevented or reduced. Indeed, while many of the  
78 intramuscular vaccines prevent SARS-CoV-2-induced pneumonia in non-human primates, they  
79 variably protect against upper airway infection and presumably transmission (Mercado et al.,  
80 2020; van Doremalen et al., 2020; Wang et al., 2020; Yu et al., 2020).

81 We recently described a chimpanzee Adenovirus (simian Ad-36)-based SARS-CoV-2  
82 vaccine (ChAd-SARS-CoV-2-S) encoding for the S protein. Intranasal administration of a single  
83 dose of ChAd-SARS-CoV-2-S induced robust humoral and cell-mediated immune responses  
84 against the S protein and prevented upper and lower airway infection in mice expressing the  
85 human ACE2 receptor (Hassan et al., 2020). This vaccine differs from ChAdOx1 nCoV-19, a  
86 chimpanzee Ad-23-based SARS-CoV-2 vaccine that is currently under phase 3 evaluation in  
87 humans as intramuscular injections (NCT04324606): ChAd-SARS-CoV-2-S is derived from a  
88 different ChAd serotype, has further deletions in the backbone to enhance production, and  
89 introduces proline mutations to stabilize the S protein into a pre-fusion form (Hassan et al., 2020).  
90 Here, as a next step toward clinical development of ChAd-SARS-CoV-2-S, we immunized rhesus  
91 macaques (*Macaca mulatta*) with a single intranasal dose of ChAd-Control or ChAd-SARS-CoV-  
92 2-S, and then challenged animals one month later with SARS-CoV-2 via the combined intranasal  
93 and intrabronchial routes. Immunization with ChAd-SARS-CoV-2 resulted in the development of  
94 anti-S, anti-RBD, and neutralizing antibodies as well as T cell responses that prevented or limited  
95 infection in nasal swabs, bronchoalveolar lavage fluid, and lung tissues after SARS-CoV-2  
96 challenge. Thus, administration of a single dose of the ChAd-SARS-CoV-2-S vaccine through a

- 97 non-injection route has the potential to protect at the portal of entry and in distant tissues, which
- 98 could limit both virus-induced disease and transmission.

## 99 RESULTS

100           **Immunogenicity analysis.** We immunized 12 adult rhesus macaques (RM, Indian origin),  
101 aged 3 to 11 years old, with ChAd-Control or ChAd-SARS-CoV-2 (n = 6 each; 3 females, 3 males).  
102 RM received a single immunization of  $10^{11}$  viral particles of the ChAd vectors by the intranasal  
103 route without adjuvant at day -28 (**Fig 1A**). All animals were pre-screened for the absence of  
104 neutralizing antibody responses against the simian AdV vector (**Fig S1**) as well as against SARS-  
105 CoV-2. Three weeks after vaccination (day -7), we detected IgG antibodies against the S and  
106 RBD proteins by ELISA in all RM immunized with ChAd-SARS-CoV-2 but not ChAd-Control  
107 vaccines (**Fig 1B-C**). Neutralizing antibody responses were assessed using an infectious SARS-  
108 CoV-2 focus-reduction neutralization test (Case et al., 2020) and were detected in all RMs  
109 immunized with ChAd-SARS-CoV-2 (**Fig 1D**). T cell responses specific to SARS-CoV-2 S were  
110 assessed by an IFN- $\gamma$  ELISPOT assay on PBMCs isolated two weeks after vaccination (day -14).  
111 All RMs immunized with ChAd-SARS-CoV-2 but not ChAd-Control developed T cell responses to  
112 SARS-CoV-2 S (**Fig 1E**).

113           **Efficacy of ChAd-SARS-CoV-2 in the upper respiratory tract.** At four weeks after  
114 immunization, RM were challenged with  $1 \times 10^6$  fifty-percent tissue culture infective dose (TCID<sub>50</sub>)  
115 of SARS-CoV-2 (strain 2019 n-CoV/USA\_WA1/2020) split between intranasal and intrabronchial  
116 routes of administration. The combined challenge route includes direct infection of the bronchial  
117 tree; while not optimal for assaying vaccines that induce mucosal immunity in the upper airway,  
118 this protocol was required since intranasal infection, by itself, does not cause consistent lung  
119 infection in RMs (Chandrashekar et al., 2020; Muñoz-Fontela et al., 2020). Even though clinical  
120 disease is limited in SARS-CoV-2 infected RM (Chandrashekar et al., 2020; Munster et al., 2020)  
121 it was less in animals immunized with ChAd-SARS-CoV-2-S than ChAd-Control vaccine (**Fig 2A**  
122 **and Table S1**). Viral loads in the nasal swabs at days +1, +3, +5, and +7 were measured by  
123 quantitative reverse transcription PCR (qRT-PCR) using primers for subgenomic (N gene,  
124 sgRNA) or genomic (nsp12) RNA. Whereas most of the RMs immunized with ChAd-Control

125 vaccine showed high levels of viral RNA through day+5 with some animals persisting through day  
126 +7, lower levels were observed in RMs immunized with ChAd-SARS-CoV-2 (**Fig 2B-E**). At day  
127 +1, only one RM vaccinated with ChAd-SARS-CoV-2 showed detectable infectious virus in nasal  
128 swabs by a tissue culture infectious dose (TCID<sub>50</sub>) assay, whereas 4 of 6 RM immunized with  
129 ChAd-Control were positive (**Fig 2F**). At later time points, infectious virus was not recovered from  
130 the nasal swabs of vaccinated animals. Overall, our data suggest that ChAd-SARS-CoV-2  
131 vaccine protects the nasopharyngeal region from SARS-CoV-2 infection and results in reduced  
132 viral RNA levels and accelerated clearance.

133 **Efficacy of ChAd-SARS-CoV-2 in the lower respiratory tract.** We next evaluated the  
134 protective effects in the lower respiratory tract by measuring infection in bronchoalveolar lavage  
135 (BAL) fluid at days +1 and +3 and lung tissues at day +7. For the BAL fluid obtained at day +1, all  
136 samples from ChAd-Control immunized RM were positive for infectious virus with titers reaching  
137 as high as 10<sup>5</sup> TCID/ml, whereas only one of six samples from ChAd-SARS-CoV-2-immunized  
138 animals was positive with a lower titer of 4 x 10<sup>2</sup> TCID/ml (**Table 1**). At day +3, only one (from  
139 ChAd-control immunized RM) of the 12 BAL fluid samples collected was positive for infectious  
140 virus. Consistent with these results, at days +1 and +3, substantially higher levels (100 and 50-  
141 fold, respectively) of viral RNA were detected in the BAL fluid of RM immunized with ChAd-control  
142 compared to ChAd-SARS-CoV-2 (**Fig 3A-B**).

143 At day +7, all animals were euthanized, and tissues were collected. Viral RNA was  
144 detected in the cervical lymph nodes (LN), mediastinal LN, and the lung tissues in the majority of  
145 ChAd-Control vaccinated animals. However, in ChAd-SARS-CoV-2-S immunized animals, lower,  
146 if any, viral RNA was detected (**Fig 3C**). Indeed, the viral RNA levels in the combined lung lobes  
147 from all ChAd-SARS-CoV-2-S immunized animals were substantially lower than that measured  
148 in ChAd-Control-immunized animals (**Fig 3D**). To begin to establish correlates of protection, the  
149 viral RNA levels in BAL fluid at day +3 were compared to the serum neutralizing or anti-S IgG  
150 titers obtained three weeks after immunization. We observed an inverse correlation between viral

151 RNA levels in BAL fluid obtained three days after SARS-CoV-2 challenge and neutralizing  
152 antibody titers (**Fig 3E**). The neutralizing antibody levels correlated better than anti-S IgG levels  
153 ( $P = 0.029$ ,  $R^2 = 0.74$  versus  $P = 0.21$ ,  $R^2 = 0.36$ , respectively) (**Fig 3E-F**). Thus, serum  
154 neutralizing antibody titers may serve as a correlate of protection for the ChAd-SARS-CoV-2-S  
155 vaccine.

156 **Pathological analysis of lungs from vaccinated RM.** In this particular set of challenge  
157 experiments, infection in RMs was mild, and chest radiographs did not show evidence of frank  
158 consolidative pneumonia. ChAd-Control vaccinated RMs developed changes consistent with mild  
159 pulmonary disease (**Fig 4A**). In two animals, we observed marked interstitial pneumonia  
160 characterized by small foci of alveolar septae thickened by edema fluid and fibrin with evidence  
161 of macrophage and neutrophil infiltration. Adjacent alveoli contained small numbers of foamy  
162 pulmonary macrophages and rare neutrophils and were occasionally lined by small numbers of  
163 type II pneumocytes. Perivascular infiltrates with small numbers of lymphocytes forming  
164 perivascular cuffs was observed. Immunohistochemistry revealed that 4 of the 6 ChAd-Control  
165 RMs were positive for viral antigen that principally localized to type I pneumocytes (**Fig 4B**). Two  
166 ChAd-SARS-CoV-2-S vaccinated RMs also showed small microscopic pulmonary lesions that  
167 were similar to the ChAd-Control animals (**Fig 4A**). Notwithstanding these findings, none of the  
168 ChAd-SARS-CoV-2-S vaccinated RMs showed evidence of viral antigen staining in lung tissues  
169 as analyzed by immunohistochemistry (**Fig 4B**).

170



171 **DISCUSSION**

172 In this study, we show that in RM, a single intranasal immunization of ChAd-SARS-CoV-  
173 2 confers protection in both the upper and lower airways against challenge with a high dose of  
174 SARS-CoV-2. These results are consistent with recent studies showing protection against ChAd-  
175 SARS-CoV-2 after a similar immunization strategy in mice expressing hACE2 receptors (Hassan  
176 et al., 2020) and in hamsters (Bricker et al., 2020). Within three weeks of intranasal vaccination,  
177 we detected S protein-specific T cell responses in peripheral blood as well as anti-S IgG and IgA,  
178 anti-RBD, and neutralizing antibodies in serum. Immunization with ChAd-SARS-CoV-2 compared  
179 to the control ChAd-Control vaccine resulted in more rapid clearance of SARS-CoV-2 RNA from  
180 nasal samples, decreased levels of viral RNA in BAL fluid, and lower levels of viral RNA in the  
181 homogenates from different regions of the lungs.

182 Our experiments showing protection against SARS-CoV-2 infection and pathogenesis in  
183 RM are consistent with other studies in nonhuman primates using similar or distinct vaccine  
184 platforms. These include: (a) a three-dose intramuscular vaccination regimen with whole  
185 inactivated SARS-CoV-2, which protected RM from SARS-CoV-2-induced pneumonia (Gao et al.,  
186 2020); (b) a two-dose intramuscular vaccination regimen with a DNA vaccine encoding the S  
187 protein, which reduced viral RNA levels in BAL fluid and nasal swabs (Yu et al., 2020); (c) a  
188 priming or two-dose intramuscular immunization with ChAdOx1 nCoV-19, a related chimpanzee  
189 adenoviral vector, resulted in reduced viral loads in BAL fluid and lung tissues without protection  
190 against upper airway infection (van Doremalen et al., 2020); (d) intramuscular immunization with  
191 a single dose human Ad26 adenoviral vector provided near-complete protection in BAL fluid and  
192 nasal swabs after SARS-CoV-2 challenge (Mercado et al., 2020) although viral RNA levels in lung  
193 tissues were not measured; and (e) one month after intranasal or intramuscular vaccination with  
194 a human Ad5 adenoviral vector, RM were protected against SARS-CoV-2 challenge as evidenced  
195 by decreased viral RNA levels in oropharyngeal swabs and lung tissues (Feng et al., 2020). While  
196 all of these studies show protection in the RM model, it nonetheless is challenging to compare

197 them directly because of the following disparities: RMs of different origin, different immunization  
198 and challenge protocols, different viral stocks and inoculation doses, different clinical and  
199 pathological scoring systems, separate assays for readout of infection, and different study  
200 locations.

201         The serum neutralization titers at 21 days with a single intranasal dose of ChAd-SARS-  
202 CoV-2 were similar to those obtained with other one or two-dose intramuscular vaccine platforms  
203 in RM. However, these levels are lower than what we observed in BALB/c or C57BL/6 mice  
204 immunized with a single dose of ChAd-SARS-CoV-2 (Hassan et al., 2020). The basis for this  
205 discrepancy remains uncertain, although higher doses on a viral particle/kg were used in mice.  
206 As reported recently by others, the relatively modest levels of immune response in RM after  
207 intranasal vaccination of adenoviral vectors still conferred effective protection against SARS-CoV-  
208 2 (Feng et al., 2020), and our data show that serum neutralizing antibody levels are a reasonable  
209 correlate of protection. These results are consistent with a recent study establishing serum  
210 antibody as a correlate of protection against SARS-CoV-2 infection in RMs (McMahan et al.,  
211 2020). In comparison, others have used anti-RBD responses in convalescent plasma from  
212 humans to predict protective immunity (Salazar et al., 2020). Future vaccine dose-response  
213 analysis in RM could provide further insight into the correlates of protection and potential ways to  
214 enhance the humoral response against SARS-CoV-2. Alternatively, a homologous intranasal or  
215 intramuscular booster dose (Richardson et al., 2013) with ChAd-SARS-CoV-2 or a heterologous  
216 adenoviral vector could augment immune responses and protection.

217         Vaccines for COVID-19 should protect against pneumonia and death and curtail  
218 transmission in the population. Our preclinical data in mice (Hassan et al., 2020), hamsters  
219 (Bricker et al., 2020), and RM suggest that ChAd-SARS-CoV-2 might accomplish these goals  
220 given its ability to reduce levels of subgenomic SARS-CoV-2 RNA and infectious virus in the BAL  
221 fluid and lungs and diminish infection at nasopharyngeal portal sites. We challenged RM with a  
222 high dose of virus ( $1 \times 10^6$  TCID<sub>50</sub>) using two routes (intranasal and intrabronchial) to test the

223 efficacy of the vaccine. As this likely does not reflect the exposure pattern in humans, the ChAd-  
224 SARS-CoV-2 vaccine may show better efficacy. Indeed, the direct intrabronchial inoculation of  
225 SARS-CoV-2 used in our challenge model, which is necessary to establish consistent pulmonary  
226 infection (Chandrashekar et al., 2020; Muñoz-Fontela et al., 2020), likely bypassed the nasal and  
227 pharyngeal mucosal immune barrier, and limited the protective impact of the intranasal vaccine.

228 In contrast to results with SARS-CoV vaccines or antibodies (Bolles et al., 2011; Liu et al.,  
229 2019; Weingartl et al., 2004), we did not observe enhanced infection, immunopathology, or  
230 enhanced disease in animals immunized with the ChAd-SARS-CoV-2 vaccine. In the ChAd-  
231 SARS-CoV-2 vaccinated and challenged RM, we did not observe worsening in clinical signs or  
232 enhanced replication compared to controls at any time point in the study. Moreover, the  
233 pathological analysis did not show evidence of the enhanced immune cell infiltration or alveolar  
234 damage seen in pulmonary tissues of vaccinated, SARS-CoV challenged RMs.

235 We acknowledge several limitations in this study: (a) we did not perform direct  
236 immunogenicity and efficacy comparisons with intramuscular delivery of ChAd-SARS-CoV-2; (b)  
237 we did not assess durability of immune responses. Future longitudinal studies must be conducted  
238 to monitor immune responses over time after intranasal vaccination with ChAd-SARS-CoV-2-S to  
239 establish durability; and (c) even with a high dose and invasive route of challenge, many of the  
240 control vaccinated animals did not develop severe lung pathology or disease, which limited our  
241 ability to conclude protection against disease in this model.

242 In summary, our studies establish that immunization of primates with ChAd-SARS-CoV-  
243 2-S induces neutralizing antibody and protective immune responses in both the upper and lower  
244 respiratory tract. While several vaccine candidates (mRNA, inactivated, viral-vectored) are in  
245 advanced phases of human clinical trials or recently granted EUAs for immunization of humans,  
246 their efficacy in curtailing transmission remains to be established. Based on preclinical data in  
247 multiple animal models, we suggest that intranasal delivery of ChAd-SARS-CoV-2-S or possibly

248 other viral-vectored or subunit-based vaccines is a promising platform for preventing SARS-CoV-  
249 2 infection, disease, and transmission, and warrants further evaluation in humans.

250 **ACKNOWLEDGEMENTS**

251 The authors thank the staff of the Rocky Mountain Veterinary Branch, NIAID, NIH for  
252 animal care and veterinary services. This study was supported by NIH contracts and grants (R01  
253 AI157155, 75N93019C00062, HHSN272201400018C) as well as the Intramural Research  
254 Program of NIAID, NIH.

255

256 **AUTHOR CONTRIBUTIONS**

257 A.O.H. generated the vaccines, performed ELISA assays, and analyzed the data. J.B.C.  
258 performed neutralization assays. H.Z. and D.H.F. designed and produced the recombinant S and  
259 RBD proteins. T.L.T.H. performed the T cell assays. F.F., A.O., J.L., and P.W.H. performed and  
260 evaluated the clinical exams, sample collection, hematology and blood chemistry and clinical  
261 scoring. F.F., K.M.W., T.L.T.H. and D.P.S performed the necropsies and organ harvest. D.P.S.  
262 performed and evaluated the histopathology. A.O.H., F.F., J.C. and K.M.W. performed and  
263 evaluated the virological assays. H.F. and M.S.D. designed experiments and secured funding.  
264 D.T.C. provided key vaccine reagents. A.O.H., H.F., and M.S.D. wrote the initial draft, with the  
265 other authors providing editorial comments.

266

267 **COMPETING FINANCIAL INTERESTS**

268 M.S.D. is a consultant for Inbios, Vir Biotechnology, NGM Biopharmaceuticals, and  
269 Carnival Corporation and on the Scientific Advisory Board of Moderna and Immunome. The  
270 Diamond laboratory has received unrelated funding support in sponsored research agreements  
271 from Moderna, Vir Biotechnology, and Emergent BioSolutions. M.S.D., D.T.C., and A.O.H. have  
272 filed a disclosure with Washington University for possible commercial development of ChAd-  
273 SARS-CoV-2. D.T.C. is equity holder in Precision Virologics, Inc, which has optioned the ChAd-  
274 SARS-CoV-2-S vaccine.

275 **FIGURE LEGENDS**

276 **Figure 1. Immunogenicity of ChAd-SARS-CoV-2-S in RM.** **A.** RM (3-11 years old) were  
277 immunized via intranasal route with a single dose ( $10^{11}$  virus particles) of ChAd-Control or ChAd-  
278 SARS-CoV-2-S vaccine. Antibody responses in sera of immunized RM at day -28 (day of  
279 immunization) and at day -7 (three weeks after immunization) were evaluated. An ELISA  
280 measured anti-S and RBD IgG levels (**B-C**), and an FRNT determined neutralization activity (**D**)  
281 ( $n = 6$  per group; Mann-Whitney test: \*\*,  $P < 0.01$ ). Bars and columns show median values, and  
282 dotted lines indicate the limit of detection (LOD) of the assays. **E.** T cell response. PBMCs were  
283 isolated at day -14, and SARS-CoV-2 specific T cells were quantified by counting IFN $\gamma$ -positive  
284 spots following stimulation with a 15-mer SARS-CoV-2 S peptide pool (2  $\mu\text{g}/\text{mL}$ ). Spot-forming  
285 unit counts per  $10^6$  stimulated PBMCs after deduction of background counts are shown ( $n = 6$ ;  
286 Mann-Whitney test: \*,  $P < 0.05$ ).

287 **Figure 2. Viral RNA levels in the upper respiratory tract of RM after SARS-CoV-2**  
288 **challenge.** RM (3-11 years old) were immunized via intranasal route with ChAd-Control or ChAd-  
289 SARS-CoV-2-S. Four weeks later, RM were challenged with  $1 \times 10^6$  fifty-percent tissue culture  
290 infective dose (TCID $_{50}$ ) of SARS-CoV-2 (strain 2019 n-CoV/USA\_WA1/2020) split between the  
291 intranasal and intrabronchial administration routes. **A.** Clinical scores after challenge. Boxes show  
292 the 25th to 75th percentiles, the center lines represent the median, and the extended whiskers  
293 from boxes indicate the minimum/maximum values. **B-E.** Nasal swabs were collected at day +1,  
294 +3, +5, and +7. Viral RNA was measured by RT-qPCR using primers specific for subgenomic  
295 mRNA (N gene) (**B and D**) or genomic RNA (nsp12 gene) (**C and E**) ( $n = 6$ , Mann-Whitney test:  
296 \*  $P < 0.05$ ; \*\*  $P < 0.01$ ). **D-E.** Longitudinal analysis of SARS-CoV-2 viral RNA in nasal swabs as  
297 determined by RT-qPCR showing the subgenomic (**D**) and genomic RNA (**E**). Each connected  
298 line shows the viral RNA in individual animal at the indicated time points. **F.** Levels of infectious  
299 virus (TCID $_{50}$  analysis) recovered from nasal swabs of RM obtained one day after SARS-CoV-2

300 challenge (n = 6, Mann-Whitney test: ns, not significant). The dotted line represents the limit of  
301 detection of the assay in this Figure.

302 **Figure 3. Viral RNA levels in lower respiratory tract of RM after SARS-CoV-2**  
303 **challenge.** RM (3-11 years old) immunized with ChAd-SARS-CoV-2-S or ChAd-Control were  
304 challenged with SARS-CoV-2 as described in **Figure 2. A-B.** BAL fluid was collected at day +1  
305 and +3, and viral subgenomic (**A**) and genomic (**B**) RNA levels were assessed in BAL fluids by  
306 RT-qPCR) (n = 6, Mann-Whitney test: \*  $P < 0.05$ ; \*\*  $P < 0.01$ ). **C-D.** Tissue samples from different  
307 lung lobes, mediastinal LN, and cervical LN were collected at day +7 after challenge. Subgenomic  
308 viral RNA levels were assessed by RT-qPCR (**C**). Viral RNA levels of the combined lung lobe  
309 specimens from ChAd-Control or ChAd-SARS-CoV-2-S immunized RM are shown (**D**) (n = 6,  
310 Mann-Whitney test: \*  $P < 0.05$ ; \*\*\*\*  $P < 0.0001$ ). **E-F.** Correlation analysis of serum neutralizing  
311 antibody titers (**E**) and anti-S antibody levels (**F**) in vaccinated RM at three weeks post-  
312 immunization with viral RNA levels in BAL at day 3 after challenge. The black lines represent the  
313 linear regression fit (n = 6, Spearman correlation test:  $P$  and  $r^2$  values shown).

314 **Figure 4. Pathological analysis of lungs of vaccinated RMs.** RMs were immunized  
315 with ChAd-control and ChAd-SARS-CoV-2-S and challenged following the scheme described in  
316 **Fig 2.** Lungs were harvested at 7 dpi. **A.** Sections were stained with hematoxylin and eosin and  
317 imaged. Each image is representative of a group of 6 RMs. **B.** SARS-CoV-2 antigen was detected  
318 in lung sections from RMs for conditions described in (**A**). Images show low- (left; scale bars, 500  
319  $\mu\text{m}$ ), medium- (middle; scale bars, 100  $\mu\text{m}$ ), and high-power magnification (right; scale bars, 50  
320  $\mu\text{m}$ ). Representative images from n = 6 RMs per group.

321 **Figure S1. Absence of anti-vector antibodies in RMs.** Serum samples were collected  
322 from RMs on day -28 prior to ChAd immunization and evaluated for neutralization activity against  
323 ChAd using a FRNT. Each symbol represents a single animal; each point represents data from  
324 two technical repeats.

325 **STAR METHODS**

326 **RESOURCE AVAILABILITY**

327 **Lead Contact.** Further information and requests for resources and reagents should be  
328 directed to and will be fulfilled by the Lead Contact, Michael S. Diamond  
329 ([diamond@wusm.wustl.edu](mailto:diamond@wusm.wustl.edu)).

330 **Materials Availability.** All requests for resources and reagents should be directed to and  
331 will be fulfilled by the Lead Contact author. This includes viruses, vaccines, and proteins. All  
332 reagents will be made available on request after completion of a Materials Transfer Agreement.

333 **Data and code availability.** All data supporting the findings of this study are available  
334 within the paper and are available from the corresponding author upon request.

335

336 **EXPERIMENTAL MODEL AND SUBJECT DETAILS**

337 **Viruses and cells.** Vero E6 (CRL-1586, American Type Culture Collection (ATCC), and  
338 HEK293 cells were cultured at 37°C in Dulbecco's Modified Eagle medium (DMEM)  
339 supplemented with 10% fetal bovine serum (FBS), 10 mM HEPES pH 7.3, 1 mM sodium pyruvate,  
340 1X non-essential amino acids, and 100 U/ml of penicillin–streptomycin. SARS-CoV-2 strain 2019  
341 n-CoV/USA\_WA1/2020 was kindly provided by the Centers for Disease Control and Prevention  
342 as a passage 3 stock. The virus was propagated once more in Vero E6 cells in DMEM (Sigma)  
343 supplemented with 2% fetal bovine serum (Gibco), 1 mM L-glutamine (Gibco), 50 U/ml penicillin  
344 and 50 µg/ml of streptomycin (Gibco). The virus stock used was passage 4, free of mycoplasma  
345 contamination, and identical to the initial deposited Genbank sequence (MN985325.1).

346 **RM experiments.** Twelve healthy rhesus macaques (*Macaca mulatta*; Indian origin,  
347 between 3 and 11 years of age and 4 – 10 kg in weight) were divided randomly into two groups  
348 of 6 animals (3 females and 3 males). All macaques were immunized 28 days prior to challenge  
349 by the intranasal route with a total dose of  $10^{11}$  viral particles of ChAd-Control or ChAd-SARS-  
350 CoV-2-S in a total volume of 1 mL (0.5 mL into each nostril). Challenge was performed with a



351 total dose of  $1 \times 10^6$  TCID<sub>50</sub> of SARS-CoV-2 equally split between the two routes in a total volume  
352 of 5 mL (4 mL intrabronchial; 1 mL intranasal). Animals were monitored at least twice daily  
353 throughout the study using an established scoring sheet (Brining et al., 2010; Munster et al.,  
354 2020). Examinations were performed on days -28, -27, -25, -21, -14, -7, 0, 1, 3, 5 and 7  
355 (euthanasia) and included clinical evaluation, thoracic radiographs, venous blood draw, and  
356 swabs. Bronchoalveolar lavage (BAL) was performed on day 1 and 3 as described (Singletary et  
357 al., 2008). The study endpoint was day 7. Following euthanasia, necropsies were performed on  
358 all animals, and organs were harvested for virology, immunology and pathology. Gross lung  
359 lesions were scored by a board-certified veterinary pathologist blinded to the group assignment.  
360 Animals were sedated with either ketamine (10-12 mg/Kg) or Telazol (3.5-5 mg/Kg) by  
361 intramuscular injection for all clinical examinations and procedures. Isoflurane in oxygen was  
362 administered via face mask as needed to maintain appropriate levels of sedation and anesthesia.

363

## 364 **METHOD DETAILS**

365 **Biosafety and ethics.** Work with infectious SARS-CoV-2 was approved by the  
366 Institutional Biosafety Committee (IBC) and performed in high biocontainment at Rocky Mountain  
367 Laboratories (RML), NIAID, NIH. Sample removal from high biocontainment followed IBC-  
368 approved Standard Operating Protocols. Animal work was approved by the RML Animal Care  
369 and Use Committee and performed by certified staff in an Association for Assessment and  
370 Accreditation of Laboratory Animal Care International accredited facility. Work followed the  
371 institution's guidelines for animal use, the guidelines and basic principles in the NIH Guide for the  
372 Care and Use of Laboratory Animals, the Animal Welfare Act, United States Department of  
373 Agriculture and the United States Public Health Service Policy on Humane Care and Use of  
374 Laboratory Animals. Nonhuman primates were single housed in adjacent primate cages allowing  
375 social interactions, in a climate-controlled room with a fixed light-dark cycle (12-hr light/12-hr  
376 dark). They were provided with commercial monkey chow, treats, and fruit twice daily with water

377 *ad libitum*. Environmental enrichment consisted of a variety of human interaction, manipulanda,  
378 commercial toys, videos, and music.

379 **Chimpanzee adenovirus vectors.** The replication-incompetent ChAd-SARS-CoV-2-S  
380 and ChAd-Control vectors were previously described (Hassan et al., 2020). Vaccines were scaled  
381 up in 293 cells and purified by CsCl density-gradient ultracentrifugation. Viral particle  
382 concentration in each vector preparation was determined by spectrophotometry at 260 nm as  
383 described (Maizel et al., 1968).

384 **Neutralization assay.** Serum samples were diluted serially and incubated with  $10^2$  FFU  
385 of SARS-CoV-2 for 1 h at 37°C. The virus-serum mixtures were added to Vero E6 cell monolayers  
386 in 96-well plates and incubated for 1 h at 37°C. Subsequently, cells were overlaid with 1% (w/v)  
387 methylcellulose in MEM supplemented with 2% FBS. Plates were incubated for 30 h then fixed  
388 using 4% PFA in PBS for 1 h at room temperature. After washing, cells were sequentially  
389 incubated with murine anti-SARS-CoV-2 S mAb (L. VanBlargan and M. Diamond, unpublished  
390 results) and a HRP-conjugated goat anti-mouse IgG (Sigma) in PBS supplemented with 0.1%  
391 (w/v) saponin (Sigma) and 0.1% BSA. TrueBlue peroxidase substrate (KPL) was used to develop  
392 the plates followed by counting the foci on a BioSpot analyzer (Cellular Technology Limited).

393 **ELISA.** Purified antigens (S or RBD) were coated onto 96-well Maxisorp clear plates at 2  
394  $\mu\text{g/mL}$  in 50 mM  $\text{Na}_2\text{CO}_3$  pH 9.6 (70  $\mu\text{L}$ ) overnight at 4°C. Coating buffers were aspirated, and  
395 wells were blocked with 200  $\mu\text{L}$  of PBS + 0.05% Tween-20 + 5 % BSA (Blocking buffer, PBSTBA)  
396 overnight at 4°C. Serum samples were diluted in PBSTBA in a separate 96-well polypropylene  
397 plate. The plates then were washed thrice with 1X PBS + 0.05% Tween-20 (PBST) followed by  
398 addition of 50  $\mu\text{L}$  of respective serum dilutions. Sera were incubated in the ELISA plates for at  
399 least 1 h at room temperature. Plates were again washed thrice in PBST followed by addition of  
400 50  $\mu\text{L}$  of 1:1000 goat anti-RM IgG(H+L)-HRP (Southern Biotech Cat. # 6200-05) in PBSTBA.  
401 Plates were incubated at room temperature for 1 h, washed thrice in PBST, and 100  $\mu\text{L}$  of 1-Step

402 Ultra TMB-ELISA was added (ThermoFisher Cat. #34028). Reactions were stopped with 50  $\mu$ L of  
403 2 M sulfuric acid. Optical density (450 nm) measurements were determined using a microplate  
404 reader (Bio-Rad).

405 **Simian Ad neutralization assays.** Serum samples were collected from RMs one day  
406 prior to ChAd immunizations. Sera were serially diluted prior to incubation with  $10^2$  FFU of ChAd-  
407 SARS-CoV-2-S for 1 h at 37°C. The virus-serum mixtures were added to Vero cell monolayers in  
408 96-well plates and incubated for 1 h at 37°C. Cells were overlaid with 1% (w/v) methylcellulose in  
409 MEM supplemented with 5% FBS. Plates were incubated at 37°C for 48 h before fixation with 4%  
410 PFA in PBS for 20 min at room temperature. Subsequently, plates were washed with PBS and  
411 incubated overnight at 4°C with murine anti-SARS-CoV-2 S mAb (L. VanBlargan and M. Diamond,  
412 unpublished results) diluted in permeabilization buffer (PBS supplemented with 0.1% (w/v)  
413 saponin and 0.1% BSA). Plates were washed again and incubated with anti-mouse-HRP (1:500;  
414 Sigma Cat. # A9044) in permeabilization buffer for 1 h at room temperature. After a final wash  
415 series, plates were developed using TrueBlue peroxidase substrate (KPL) and foci were counted  
416 on a BioSpot analyzer (Cellular Technology Limited).

417 **T cell assay.** Peripheral blood mononuclear cells (PBMCs) were prepared by  
418 centrifugation on a Ficoll gradient. Cells ( $3.0 \times 10^6$  PBMCs) from each RM were seeded into  
419 duplicate wells in a 96-well flat-bottom plate which pre-coated with human IFN- $\gamma$ -capturing  
420 antibody ( $3.0 \times 10^5$  cells/well-Human IFN- $\gamma$  Single-Color ELISPOT-ImmunoSpot). PBMCs were  
421 stimulated with SARS-CoV-2 spike protein peptide pools, at a final concentration of 2  $\mu$ g/mL per  
422 peptide, for 24 h in a humidified incubator with 5% CO<sub>2</sub> at 37 °C. IFN- $\gamma$  spots were developed  
423 according to the manufacturer's protocol and counted by CTL 328 ImmunoSpot® Analyzer and  
424 ImmunoSpot® Software.

425 **Measurement of viral burden.** SARS-CoV-2 infected animals were euthanized at day +7  
426 after SARS-CoV-2 challenge, and tissues were collected. Tissues (up to 30 mg) were  
427 homogenized in RLT buffer. RNA was extracted using RNeasy kit (Qiagen) according to

428 manufacturer's instructions. RNA was extracted from BAL fluid and nasal swabs using the  
429 QiaAmp Viral RNA kit (Qiagen) according to manufacturer's instructions. SARS-CoV-2 RNA  
430 levels were measured by one-step TaqMan RT-qPCR assay. SARS-CoV-2 nucleocapsid (N) or  
431 nsp12 specific primers and probe sets were used: (N: F primer: ATGCTGCAATCGTGCTACAA;  
432 R primer: GACTGCCGCCTCTGCTC; probe: /56-  
433 FAM/TCAAGGAAC/ZEN/AACATTGCCAA/3IABkFQ/ and nsp12: F primer:  
434 GTGARATGGTCATGTGTGGCGG; R primer: CARATGTTAAASACACTATTAGCATA; probe 1:  
435 6-FAM/CCAGGTGGWACRTCATCMGGTGATGC; probe 2: 6-  
436 FAM/CAGGTGGAACCTCATCAGGAGATGC. Viral RNA was expressed as N or nsp12 gene  
437 copy numbers per g of tissues or per ml of fluid.

438 Virus isolation was performed on BAL liquid and homogenized lung tissues (approximately  
439 30 mg in 1 mL DMEM using a TissueLyser (Qiagen)) and inoculating Vero E6 cells in a 24 well  
440 plate with 250  $\mu$ L of cleared and a 1:10 dilution of the homogenate. One hour after inoculation of  
441 cells, the supernatant was removed and replaced with 500  $\mu$ L DMEM (Sigma-Aldrich)  
442 supplemented with 2% fetal bovine serum, 1 mM L-glutamine, 50 U/mL penicillin and 50  $\mu$ g/mL  
443 of streptomycin. Six days after inoculation, cytopathogenic effect was scored, and the TCID<sub>50</sub> was  
444 calculated.

445 **Histopathology and immunohistochemistry.** Histopathology and  
446 immunohistochemistry were performed on RM tissues. After fixation for a minimum of 7 days in  
447 10% neutral-buffered formalin and embedding in paraffin, tissue sections were stained with  
448 hematoxylin and eosin (H & E). Tissues were placed in cassettes and processed with a Sakura  
449 VIP-6 Tissue Tek on a 12-hour automated schedule, using a graded series of ethanol, xylene,  
450 and ParaPlast Extra. Embedded tissues are sectioned at 5  $\mu$ m and dried overnight at 42°C prior  
451 to staining. Specific anti-SARS-CoV-2 immunoreactivity was detected using GenScript  
452 U864YFA140-4/CB2093 NP-1 at a 1:1,000 dilution. The secondary antibody used was an anti-  
453 rabbit IgG polymer from Vector Laboratories ImPress VR. Tissues were processed for

454 immunohistochemistry using the Discovery Ultra automated processor (Ventana Medical  
455 Systems) with a ChromoMap DAB kit (Roche Tissue Diagnostics).

456

#### 457 **QUANTIFICATION AND STATISTICAL ANALYSIS**

458           Statistical significance was assigned when  $P$  values were  $< 0.05$  using Prism Version 8  
459 (GraphPad). Tests, number of animals ( $n$ ), median values, and statistical comparison groups are  
460 indicated in the Figure legends.

461

462 **Table 1. Virus isolation from BAL fluid**

463

| Vaccine           | RM # | BAL Day 1 | BAL Day 3 |
|-------------------|------|-----------|-----------|
| ChAd-SARS-COV-2-S | 1    | -         | -         |
|                   | 2    | -         | -         |
|                   | 3    | -         | -         |
|                   | 4    | -         | -         |
|                   | 5    | -         | -         |
|                   | 6    | +         | -         |
| ChAd-Control      | 7    | +         | -         |
|                   | 8    | ++        | -         |
|                   | 9    | +++       | ++        |
|                   | 10   | ++        | -         |
|                   | 11   | +         | -         |
|                   | 12   | +         | -         |

464

465 - : negative, + :  $<10^2$  TCID<sub>50</sub>/ml; TCID<sub>50</sub>, tissue culture infectious dose 50, ++ :  $10^2$ - $10^4$

466 TCID<sub>50</sub>/ml, and +++ :  $10^5$  TCID<sub>50</sub>/ml

467

## 468 REFERENCES

- 469 Baden, L.R., El Sahly, H.M., Essink, B., Kotloff, K., Frey, S., Novak, R., Diemert, D., Spector,  
470 S.A., Roupshael, N., Creech, C.B., *et al.* (2020). Efficacy and Safety of the mRNA-1273 SARS-  
471 CoV-2 Vaccine. *N Engl J Med.*  
472
- 473 Barnes, C.O., Jette, C.A., Abernathy, M.E., Dam, K.A., Esswein, S.R., Gristick, H.B., Malyutin,  
474 A.G., Sharaf, N.G., Huey-Tubman, K.E., Lee, Y.E., *et al.* (2020). SARS-CoV-2 neutralizing  
475 antibody structures inform therapeutic strategies. *Nature* 588, 682-687.  
476
- 477 Bolles, M., Deming, D., Long, K., Agnihothram, S., Whitmore, A., Ferris, M., Funkhouser, W.,  
478 Gralinski, L., Titura, A., Heise, M., *et al.* (2011). A double-inactivated severe acute respiratory  
479 syndrome coronavirus vaccine provides incomplete protection in mice and induces increased  
480 eosinophilic proinflammatory pulmonary response upon challenge. *J Virol* 85, 12201-12215.  
481
- 482 Bricker, T.L., Darling, T.L., Hassan, A.O., Harastani, H.H., Soung, A., Jiang, X., Dai, Y.N., Zhao,  
483 H., Adams, L.J., Holtzman, M.J., *et al.* (2020). A single intranasal or intramuscular immunization  
484 with chimpanzee adenovirus vectored SARS-CoV-2 vaccine protects against pneumonia in  
485 hamsters. *bioRxiv.*  
486
- 487 Brining, D.L., Mattoon, J.S., Kercher, L., LaCasse, R.A., Safronetz, D., Feldmann, H., and Parnell,  
488 M.J. (2010). Thoracic radiography as a refinement methodology for the study of H1N1 influenza  
489 in cynomolgus macaques (*Macaca fascicularis*). *Comparative medicine* 60, 389-395.  
490
- 491 Burton, D.R., and Walker, L.M. (2020). Rational Vaccine Design in the Time of COVID-19. *Cell*  
492 *Host Microbe* 27, 695-698.  
493
- 494 Cao, L., Goreshnik, I., Coventry, B., Case, J.B., Miller, L., Kozodoy, L., Chen, R.E., Carter, L.,  
495 Walls, A.C., Park, Y.J., *et al.* (2020a). De novo design of picomolar SARS-CoV-2 miniprotein  
496 inhibitors. *Science* 370, 426-431.  
497
- 498 Cao, Y., Su, B., Guo, X., Sun, W., Deng, Y., Bao, L., Zhu, Q., Zhang, X., Zheng, Y., Geng, C., *et*  
499 *al.* (2020b). Potent neutralizing antibodies against SARS-CoV-2 identified by high-throughput  
500 single-cell sequencing of convalescent patients' B cells. *Cell* 182, 73-84.  
501
- 502 Case, J.B., Rothlauf, P.W., Chen, R.E., Liu, Z., Zhao, H., Kim, A., S., Bloyet, L.M., Zeng, Q.,  
503 Tahan, S., Droit, L., *et al.* (2020). Neutralizing antibody and soluble ACE2 inhibition of a  
504 replication-competent VSV-SARS-CoV-2 and a clinical isolate of SARS-CoV-2. *Cell Host and*  
505 *Microbe* 28, 475-485.  
506
- 507 Chandrashekar, A., Liu, J., Martinot, A.J., McMahan, K., Mercado, N.B., Peter, L., Tostanoski,  
508 L.H., Yu, J., Maliga, Z., Nekorchuk, M., *et al.* (2020). SARS-CoV-2 infection protects against  
509 rechallenge in rhesus macaques. *Science* 369, 812-817.  
510
- 511 Cheung, E.W., Zachariah, P., Gorelik, M., Boneparth, A., Kernie, S.G., Orange, J.S., and Milner,  
512 J.D. (2020). Multisystem Inflammatory Syndrome Related to COVID-19 in Previously Healthy  
513 Children and Adolescents in New York City. *JAMA* 324, 294-296.  
514
- 515 Feng, L., Wang, Q., Shan, C., Yang, C., Feng, Y., Wu, J., Liu, X., Zhou, Y., Jiang, R., Hu, P., *et*  
516 *al.* (2020). An adenovirus-vectored COVID-19 vaccine confers protection from SARS-COV-2  
517 challenge in rhesus macaques. *Nat Commun* 11, 4207.

518  
519 Gao, Q., Bao, L., Mao, H., Wang, L., Xu, K., Yang, M., Li, Y., Zhu, L., Wang, N., Lv, Z., *et al.*  
520 (2020). Rapid development of an inactivated vaccine candidate for SARS-CoV-2. *Science* 369,  
521 77-81.  
522  
523 Graham, B.S. (2020). Rapid COVID-19 vaccine development. *Science* 368, 945-946.  
524  
525 Guan, W.J., Ni, Z.Y., Hu, Y., Liang, W.H., Ou, C.Q., He, J.X., Liu, L., Shan, H., Lei, C.L., Hui,  
526 D.S.C., *et al.* (2020). Clinical Characteristics of Coronavirus Disease 2019 in China. *N Engl J*  
527 *Med.*  
528  
529 Hassan, A.O., Kafai, N.M., Dmitriev, I.P., Fox, J.M., Smith, B.K., Harvey, I.B., Chen, R.E., Winkler,  
530 E.S., Wessel, A.W., Case, J.B., *et al.* (2020). A Single-Dose Intranasal ChAd Vaccine Protects  
531 Upper and Lower Respiratory Tracts against SARS-CoV-2. *Cell* 183, 169-184.e113.  
532  
533 Hoffmann, M., Kleine-Weber, H., Schroeder, S., Kruger, N., Herrler, T., Erichsen, S., Schiergens,  
534 T.S., Herrler, G., Wu, N.H., Nitsche, A., *et al.* (2020). SARS-CoV-2 Cell Entry Depends on ACE2  
535 and TMPRSS2 and Is Blocked by a Clinically Proven Protease Inhibitor. *Cell.*  
536  
537 Letko, M., Marzi, A., and Munster, V. (2020). Functional assessment of cell entry and receptor  
538 usage for SARS-CoV-2 and other lineage B betacoronaviruses. *Nature microbiology* 5, 562-569.  
539  
540 Liu, L., Wei, Q., Lin, Q., Fang, J., Wang, H., Kwok, H., Tang, H., Nishiura, K., Peng, J., Tan, Z.,  
541 *et al.* (2019). Anti-spike IgG causes severe acute lung injury by skewing macrophage responses  
542 during acute SARS-CoV infection. *JCI insight* 4.  
543  
544 Maizel, J.V., Jr., White, D.O., and Scharff, M.D. (1968). The polypeptides of adenovirus. I.  
545 Evidence for multiple protein components in the virion and a comparison of types 2, 7A, and 12.  
546 *Virology* 36, 115-125.  
547  
548 Mao, R., Qiu, Y., He, J.S., Tan, J.Y., Li, X.H., Liang, J., Shen, J., Zhu, L.R., Chen, Y., Iacucci, M.,  
549 *et al.* (2020). Manifestations and prognosis of gastrointestinal and liver involvement in patients  
550 with COVID-19: a systematic review and meta-analysis. *The lancet Gastroenterology &*  
551 *hepatology.*  
552  
553 McMahan, K., Yu, J., Mercado, N.B., Loos, C., Tostanoski, L.H., Chandrashekar, A., Liu, J., Peter,  
554 L., Atyeo, C., Zhu, A., *et al.* (2020). Correlates of protection against SARS-CoV-2 in rhesus  
555 macaques. *Nature.*  
556  
557 Mercado, N.B., Zahn, R., Wegmann, F., Loos, C., Chandrashekar, A., Yu, J., Liu, J., Peter, L.,  
558 McMahan, K., Tostanoski, L.H., *et al.* (2020). Single-shot Ad26 vaccine protects against SARS-  
559 CoV-2 in rhesus macaques. *Nature* 586, 583-588.  
560  
561 Muñoz-Fontela, C., Dowling, W.E., Funnell, S.G.P., Gsell, P.S., Riveros-Balta, A.X., Albrecht,  
562 R.A., Andersen, H., Baric, R.S., Carroll, M.W., Cavaleri, M., *et al.* (2020). Animal models for  
563 COVID-19. *Nature* 586, 509-515.  
564  
565 Munster, V.J., Feldmann, F., Williamson, B.N., van Doremalen, N., Pérez-Pérez, L., Schulz, J.,  
566 Meade-White, K., Okumura, A., Callison, J., Brumbaugh, B., *et al.* (2020). Respiratory disease in  
567 rhesus macaques inoculated with SARS-CoV-2. *Nature* 585, 268-272.  
568



569 Pinto, D., Park, Y.J., Beltramello, M., Walls, A.C., Tortorici, M.A., Bianchi, S., Jaconi, S., Culap,  
570 K., Zatta, F., De Marco, A., *et al.* (2020). Cross-neutralization of SARS-CoV-2 by a human  
571 monoclonal SARS-CoV antibody. *Nature* 583, 290-295.  
572  
573 Polack, F.P., Thomas, S.J., Kitchin, N., Absalon, J., Gurtman, A., Lockhart, S., Perez, J.L., Pérez  
574 Marc, G., Moreira, E.D., Zerbini, C., *et al.* (2020). Safety and Efficacy of the BNT162b2 mRNA  
575 Covid-19 Vaccine. *N Engl J Med* 383, 2603-2615.  
576  
577 Richardson, J.S., Pillet, S., Bello, A.J., and Kobinger, G.P. (2013). Airway delivery of an  
578 adenovirus-based Ebola virus vaccine bypasses existing immunity to homologous adenovirus in  
579 nonhuman primates. *J Virol* 87, 3668-3677.  
580  
581 Salazar, E., Kuchipudi, S.V., Christensen, P.A., Eagar, T., Yi, X., Zhao, P., Jin, Z., Long, S.W.,  
582 Olsen, R.J., Chen, J., *et al.* (2020). Convalescent plasma anti-SARS-CoV-2 spike protein  
583 ectodomain and receptor binding domain IgG correlate with virus neutralization. *J Clin Invest* 130,  
584 6728-6738.  
585  
586 Singletary, M.L., Phillippi-Falkenstein, K.M., Scanlon, E., Bohm, R.P., Jr., Veazey, R.S., and Gill,  
587 A.F. (2008). Modification of a common BAL technique to enhance sample diagnostic value.  
588 *Journal of the American Association for Laboratory Animal Science : JAALAS* 47, 47-51.  
589  
590 Tortorici, M.A., Beltramello, M., Lempp, F.A., Pinto, D., Dang, H.V., Rosen, L.E., McCallum, M.,  
591 Bowen, J., Minola, A., Jaconi, S., *et al.* (2020). Ultrapotent human antibodies protect against  
592 SARS-CoV-2 challenge via multiple mechanisms. *Science* 370, 950-957.  
593  
594 van Doremalen, N., Lambe, T., Spencer, A., Belij-Rammerstorfer, S., Purushotham, J.N., Port,  
595 J.R., Avanzato, V.A., Bushmaker, T., Flaxman, A., Ulaszewska, M., *et al.* (2020). ChAdOx1 nCoV-  
596 19 vaccine prevents SARS-CoV-2 pneumonia in rhesus macaques. *Nature* 586, 578-582.  
597  
598 Wang, H., Zhang, Y., Huang, B., Deng, W., Quan, Y., Wang, W., Xu, W., Zhao, Y., Li, N., Zhang,  
599 J., *et al.* (2020). Development of an Inactivated Vaccine Candidate, BBIBP-CorV, with Potent  
600 Protection against SARS-CoV-2. *Cell* 182, 713-721.e719.  
601  
602 Weingartl, H., Czub, M., Czub, S., Neufeld, J., Marszal, P., Gren, J., Smith, G., Jones, S., Proulx,  
603 R., Deschambault, Y., *et al.* (2004). Immunization with modified vaccinia virus Ankara-based  
604 recombinant vaccine against severe acute respiratory syndrome is associated with enhanced  
605 hepatitis in ferrets. *J Virol* 78, 12672-12676.  
606  
607 Wichmann, D., Sperhake, J.P., Lütgehetmann, M., Steurer, S., Edler, C., Heinemann, A.,  
608 Heinrich, F., Mushumba, H., Kniep, I., Schröder, A.S., *et al.* (2020). Autopsy Findings and Venous  
609 Thromboembolism in Patients With COVID-19: A Prospective Cohort Study. *Ann Intern Med* 173,  
610 268-277.  
611  
612 Wrapp, D., Wang, N., Corbett, K.S., Goldsmith, J.A., Hsieh, C.L., Abiona, O., Graham, B.S., and  
613 McLellan, J.S. (2020). Cryo-EM structure of the 2019-nCoV spike in the prefusion conformation.  
614 *Science* 367, 1260-1263.  
615  
616 Yu, J., Tostanoski, L.H., Peter, L., Mercado, N.B., McMahan, K., Mahrokhian, S.H., Nkolola, J.P.,  
617 Liu, J., Li, Z., Chandrashekar, A., *et al.* (2020). DNA vaccine protection against SARS-CoV-2 in  
618 rhesus macaques. *Science* 369, 806-811.  
619

620 Zhou, F., Yu, T., Du, R., Fan, G., Liu, Y., Liu, Z., Xiang, J., Wang, Y., Song, B., Gu, X., *et al.*  
621 (2020a). Clinical course and risk factors for mortality of adult inpatients with COVID-19 in Wuhan,  
622 China: a retrospective cohort study. *Lancet* 395, 1054-1062.  
623  
624 Zhou, P., Yang, X.L., Wang, X.G., Hu, B., Zhang, L., Zhang, W., Si, H.R., Zhu, Y., Li, B., Huang,  
625 C.L., *et al.* (2020b). A pneumonia outbreak associated with a new coronavirus of probable bat  
626 origin. *Nature* 579, 270-273.  
627  
628 Zost, S.J., Gilchuk, P., Chen, R.E., Case, J.B., Reidy, J.X., Trivette, A., Nargi, R.S., Sutton, R.E.,  
629 Suryadevara, N., Chen, E.C., *et al.* (2020). Rapid isolation and profiling of a diverse panel of  
630 human monoclonal antibodies targeting the SARS-CoV-2 spike protein. *Nat Med* 26, 1422-1427.  
631



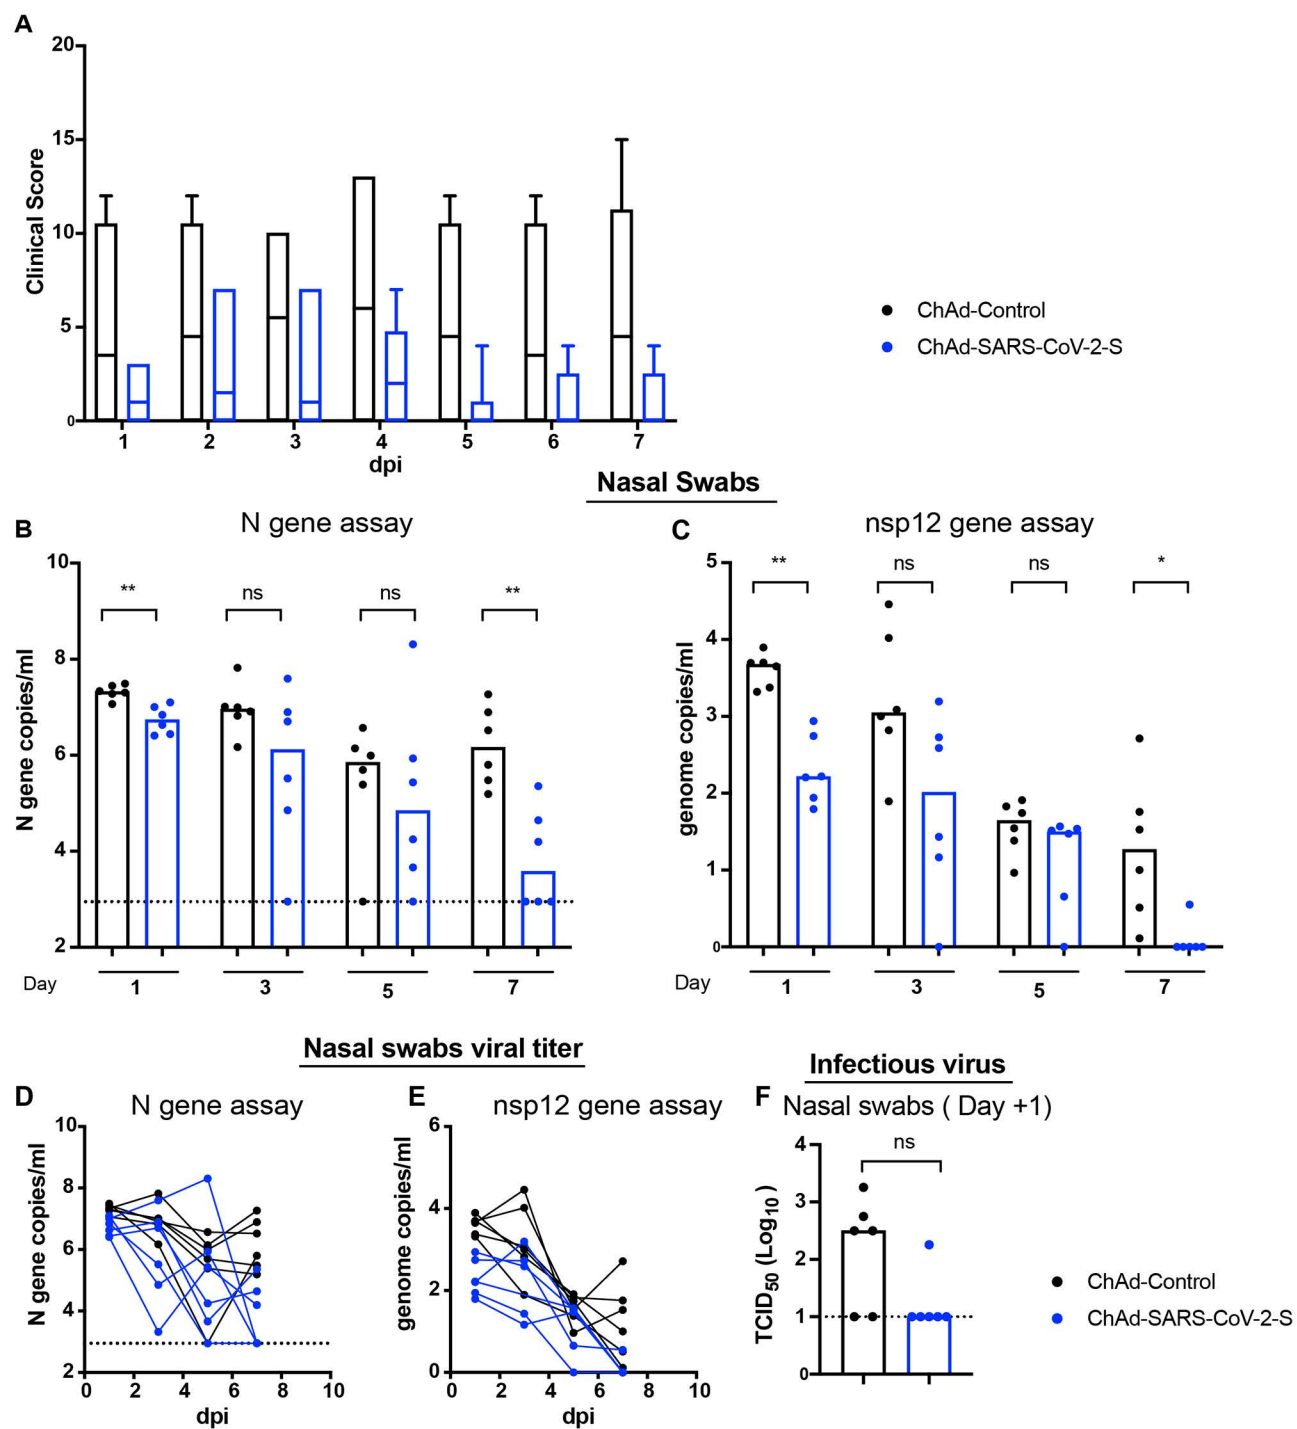

## BAL

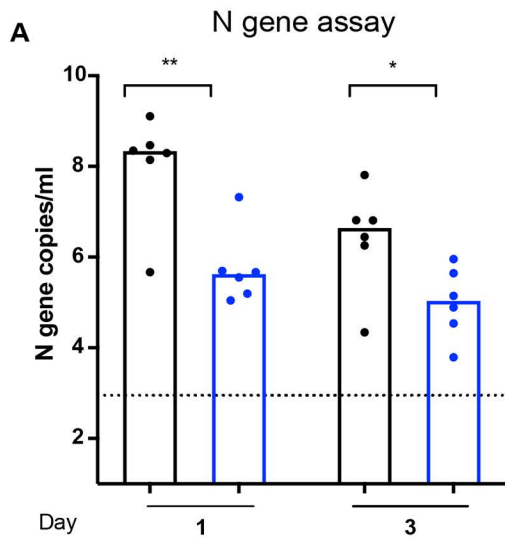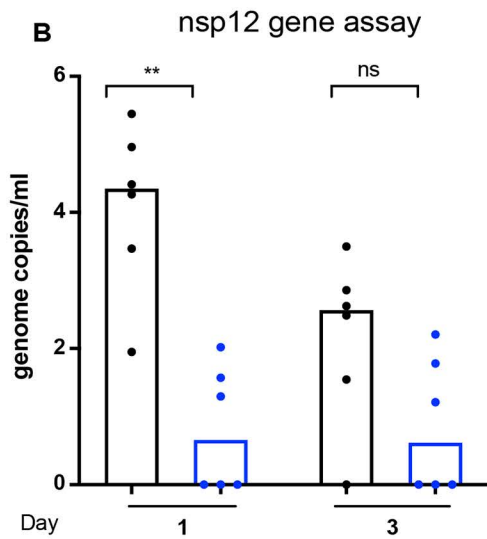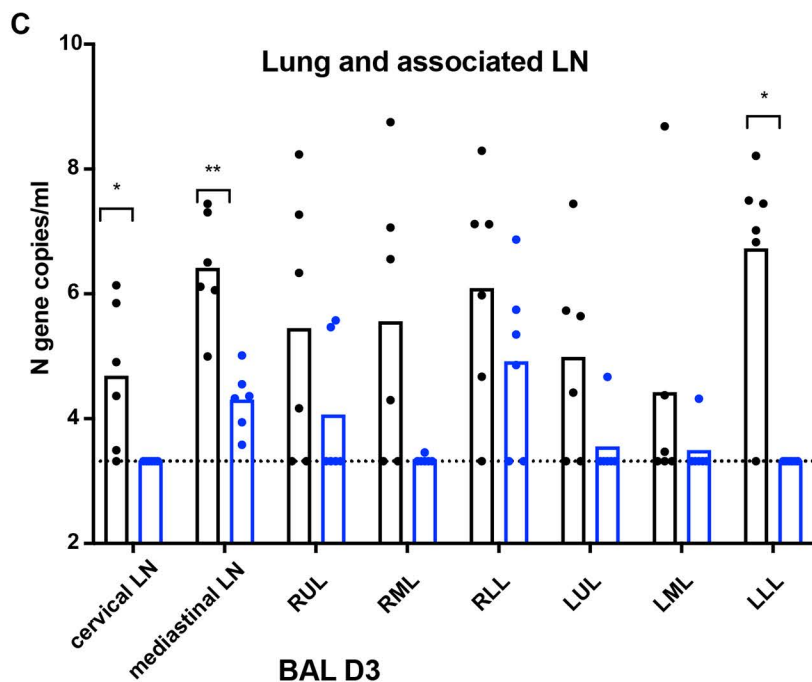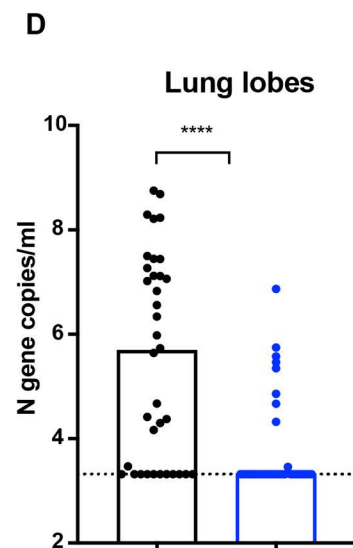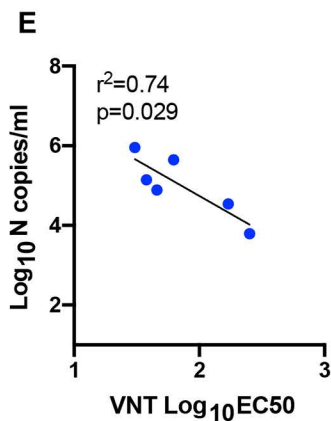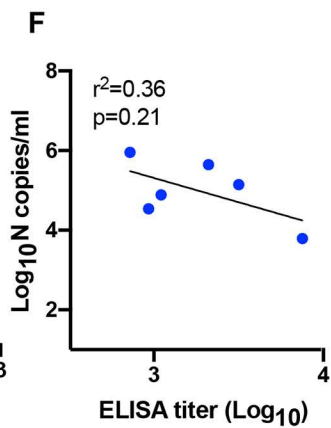

- ChAd-Control
- ChAd-SARS-CoV-2-S

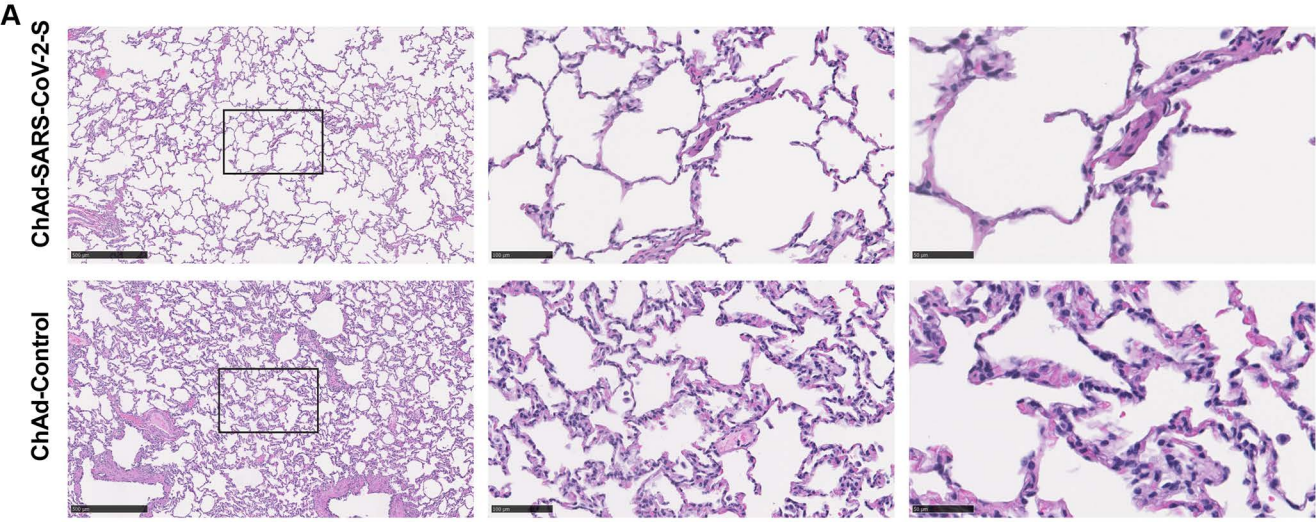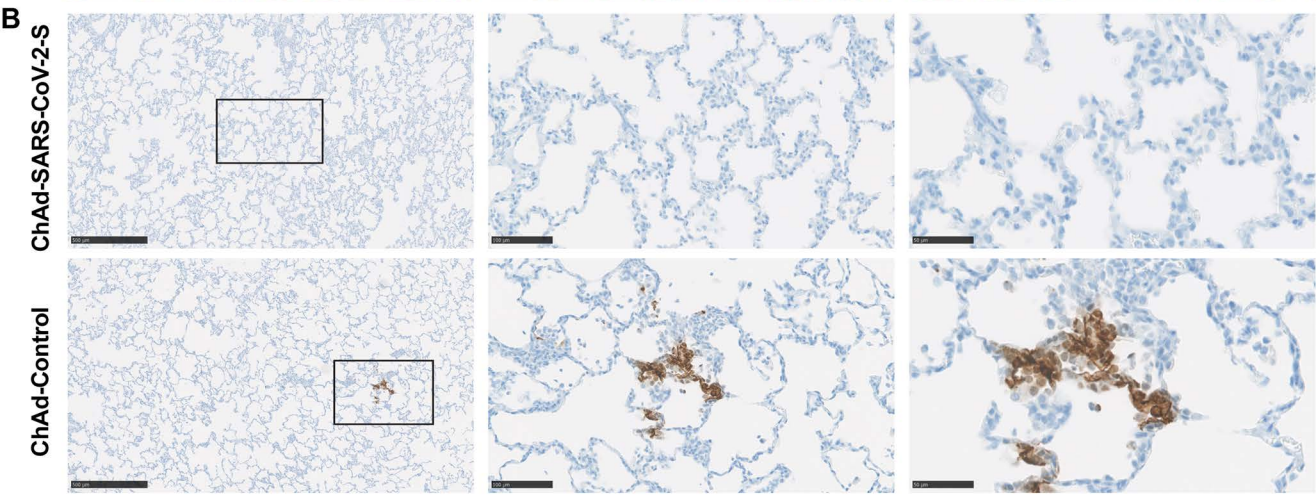

Source: https://www.biorxiv.org/content/biorxiv/early/2021/01/26/2021.01.26.428251.full.pdf
